# Supplementary material for: An efficient synthesis of perhydro[1,2,4]triazolo[1,2-a][1,2,4]triazole-1,5-dithiones catalyzed by TiO2-functionalized nano-Fe3O4 encapsulated-silica particles as a reusable magnetic nanocatalyst
Source: Royal Society of Chemistry journal article supplement (doi:10.1039/c5ra23457c), 2015-01-01
Supplement: c5ra23457c1.pdf [file c5ra23457c1.pdf]

### 2.5.1. Spectral data for compounds

2.5.1.1. Tetrahydro-3,7-diphenyl-[1,2,4] triazolo [1,2-a] [1,2,4] triazole-1,5-dithione (**3a**): white solid, m.p= 188-189 °C;  $R_f$  (petroleum ether:ethylacetate= 7:3 (v/v)) = 0.26; IR (KBr)/  $\nu$  ( $\text{cm}^{-1}$ ): 3385, 3180, 1500, 1251;  $^1\text{H}$  NMR (Acetone- $d_6$ , 400 MHz)/  $\delta$  ppm: 6.81 (s, 2H, CH), 7.38-7.42 (m, 10H, Ar-H), 11.42 (s, 2H, NH);  $^{13}\text{C}$  NMR (DMSO- $d_6$ , 100 MHz)  $\delta$  (ppm): 73 (CH), 126.25 (CH), 127.76 (CH), 128.31 (CH), 129.73 (CH), 184.1 (C=S) ppm;  $\text{CHN}_{\text{Calculated}}$  (%): C (58.89), H (4.29), N (17.18), S (19.63);  $\text{CHN}_{\text{Found}}$  (%): C (58.82), H (4.39), N (17.34), S (19.73).<sup>17</sup>

2.5.1.2. Tetrahydro-3,7-bis (3-nitrophenyl)-[1,2,4] triazolo [1,2-a] [1,2,4] triazole-1,5-dithione (**3b**): white solid, m.p= 190-191 °C;  $R_f$  (petroleum ether: ethyl acetate= 7:3 (v/v)) = 0.15; IR (KBr)/  $\nu$  ( $\text{cm}^{-1}$ ): 3215, 1616, 1529, 1491, 1352, 1247, 1161;  $^1\text{H}$  NMR (Acetone- $d_6$ , 400 MHz)/  $\delta$  ppm: 7.25 (s, 2H, CH), 7.80 (t,  $J$  = 7.0 Hz, 2H, ArH), 8.00 (d,  $J$  = 7.0 Hz, 2H, ArH), 8.31 (d,  $J$  = 7.0 Hz, 2H, ArH), 8.39 (s, 2H, ArH), 10.38 (s, 2H, NH) ppm;  $^{13}\text{C}$  NMR (Acetone- $d_6$ , 100 MHz)  $\delta$  (ppm): 72.0 (CH), 119.43 (CH), 122.55 (CH), 129.88 (CH), 133.76 (CH), 145.50 (CH), 148.60 (C), 158.09 (C), 184.11 (C=S) ppm;  $\text{CHN}_{\text{Calculated}}$  (%): C (46.02), H (2.2.87), N (20.13), S (15.62), O (15.36);  $\text{CHN}_{\text{Found}}$  (%): C (46.45), H (3.01), N (19.18), S (15.35), O (16.01).

2.5.1.3. Tetrahydro-3,7-bis (4-methoxyphenyl)-[1,2,4] triazolo [1,2-a] [1,2,4] triazole-1,5-dithione (**3c**): white solid, m.p= 160-162 °C;  $R_f$  (petroleum ether: ethyl acetate= 7:3 (v/v)) = 0.18; IR (KBr)/  $\nu$  ( $\text{cm}^{-1}$ ): 3390, 3157, 2960, 1613, 1508, 1249, 1173, 1028;  $^1\text{H}$  NMR (Acetone- $d_6$ , 400 MHz)/  $\delta$  ppm: 3.72 (s, 6H, OCH<sub>3</sub>), 6.75 (s, 2H, CH), 6.99 (s, 4H, Ar-H), 7.28-7.30 (d,  $J$  = 6.8 Hz, 4H, Ar-H), 11.31 (s, 2H, NH) ppm;  $^{13}\text{C}$  NMR (DMSO- $d_6$ , 100 MHz)  $\delta$  (ppm): 55.73 (CH<sub>3</sub>), 77.03 (CH), 114.76 (CH), 127.67 (CH), 130.0 (C), 160.35 (C), 184.0 (C=S); ppm;  $\text{CHN}_{\text{Calculated}}$  (%): C (55.96), H (4.66), N (14.51), S (16.58);  $\text{CHN}_{\text{Found}}$  (%): C (55.93), H (4.76), N (14.72), S (16.68).<sup>17</sup>

2.5.1.4. Tetrahydro-3,7-bis (2-chlorophenyl)-[1,2,4] triazolo [1,2-a] [1,2,4] triazole-1,5-dithione (**3d**): white solid, m.p= 197 °C;  $R_f$  (petroleum ether: ethyl acetate= 7:3 (v/v)) = 0.32; IR (KBr)  $\nu$  ( $\text{cm}^{-1}$ ): 3433, 3183, 2929, 1498, 1251;  $^1\text{H}$  NMR (DMSO- $d_6$ , 400 MHz)  $\delta$  (ppm): 7.16 (s, 1H, CH), 7.34-7.36 (m, 1H, Ar-H), 7.43-7.47 (m, 2H, Ar-H), 7.54-7.61 (m, 1H, Ar-H), 11.48 (s, 1H, NH);  $^{13}\text{C}$  NMR (DMSO- $d_6$ , 100 MHz)  $\delta$  (ppm): 74.86 (CH), 128.14 (CH), 128.63 (CH), 130.62 (CH), 131.87 (CH), 132.48 (C), 134.01 (C), 185.19 (C=S) ppm;  $\text{CHN}_{\text{Calculated}}$  (%): C (48.60), H (3.04), N (14.18), S (16.20), Cl (17.72);  $\text{CHN}_{\text{Found}}$  (%): C (47.99), H (3.58), N (14.76), S (16.09), Cl (17.58).

2.5.1.5. Tetrahydro-3,7-bis (3-chlorophenyl)-[1,2,4] triazolo [1,2-a] [1,2,4] triazole-1,5-dithione (**3e**): white solid, m.p= 194-195 °C;  $R_f$  (petroleum ether: ethyl acetate= 7:3 (v/v)) = 0.35; IR (KBr)/  $\nu$  ( $\text{cm}^{-1}$ ): 3427, 3191, 2927, 1501, 1247;  $^1\text{H}$  NMR (Acetone- $d_6$ , 400 MHz)/  $\delta$  ppm: 7.07 (s, 1H, CH), 7.47-7.51 (m, 3H, Ar-H), 7.55 (s, 1H, Ar-H), 10.14 (s, 1H, NH);  $^{13}\text{C}$  NMR (DMSO- $d_6$ , 100 MHz)  $\delta$  (ppm): 76.62 (CH), 124.88 (CH), 126.39 (CH), 128.12 (CH), 131.84 (CH), 134.15 (C), 139.76 (C), 184.47 (C=S) ppm;  $\text{CHN}_{\text{Calculated}}$  (%): C (48.60), H (3.04), N (14.18), S (16.20), Cl (17.72);  $\text{CHN}_{\text{Found}}$  (%): C (48.32), H (3.13), N (14.31), S (16.29), Cl (17.81).<sup>17</sup>

2.5.1.6. Tetrahydro-3,7-bis (4-chlorophenyl)-[1,2,4] triazolo [1,2-a] [1,2,4] triazole-1,5-dithione (**3f**): white solid, m.p= 201-203 °C;  $R_f$  (petroleum ether: ethyl acetate)= 7:3 (v/v)) = 0.31; IR (KBr)/  $\nu$  ( $\text{cm}^{-1}$ ): 3438, 3168, 2925, 1629, 1492, 1249, 1157;  $^1\text{H}$  NMR (Acetone- $d_6$ , 400 MHz)/  $\delta$  ppm: 6.84 (s, 2H, CH), 7.39 (s, 4H, ArH), 7.51 (s, 4H, ArH), 11.48 (s, 2H, NH) ppm;  $^{13}\text{C}$  NMR (DMSO- $d_6$ , 100 MHz)  $\delta$  (ppm): 75.50 (CH), 128.4 (CH), 130.45 (CH), 133.21 (CH), 133.8 (CH), 184.1 (C=S) ppm;  $\text{CHN}_{\text{Calculated}}$  (%): C (48.60), H (3.04), N (14.18), S (16.20), Cl (17.72);  $\text{CHN}_{\text{Found}}$  (%): C (58.82), H (4.39), N (17.34), S (19.73).<sup>17</sup>

2.5.1.7. Tetrahydro-3,7-bis (3-hydroxyphenyl)-[1,2,4] triazolo [1,2-a] [1,2,4] triazole-1,5-dithione (**3g**): white solid, m.p= 165-167 °C;  $R_f$  (petroleum ether: ethyl acetate= 7:3 (v/v)) = 0.12; IR (KBr)/  $\nu$  ( $\text{cm}^{-1}$ ): 3423, 3177, 2958, 1601, 1505, 1250;  $^1\text{H}$  NMR (Acetone- $d_6$ , 400 MHz)  $\delta$  (ppm): 6.95 (s, 4H, Ar-H), 7.24 (s, 1H, CH), 8.62 (s, 1H, OH), 9.97 (s, 1H, NH) ppm;  $^{13}\text{C}$  NMR (Acetone- $d_6$ , 100 MHz)  $\delta$  (ppm): 73 (CH), 112.01 (CH), 113.88 (CH), 119.03 (CH), 130.0 (CH), 145.50 (CH), 158.09 (C), 184.0 (C=S) ppm;  $\text{CHN}_{\text{Calculated}}$  (%): C (53.70), H (3.88), N (15.04), S (17.68), O (9.70);  $\text{CHN}_{\text{Found}}$  (%): C (53.76), H (3.58), N (15.34), S (17.74), O (9.66).

2.5.1.8. Tetrahydro-3,7-bis (3-hydroxy-4-methoxyphenyl)-[1,2,4] triazolo [1,2-a][1,2,4]triazole-1,5-dithione (**3h**): white solid, m.p= 177-180 °C;  $R_f$  (petroleum ether: ethyl acetate= 7:3 (v/v)) = 0.06; IR (KBr)/  $\nu$  ( $\text{cm}^{-1}$ ): 3422, 2929, 1510, 1278, 1133;  $^1\text{H}$  NMR (Acetone- $d_6$ , 400 MHz)/  $\delta$  ppm: 3.81 (s, 6H, OCH<sub>3</sub>), 6.86 (s, 2H, CH), 6.96-7.40 (m, 6H, ArH), 7.89 (s, 2H, OH), 9.88 (s, 2H, NH) ppm;  $^{13}\text{C}$  NMR (Acetone- $d_6$ , 100 MHz)  $\delta$  (ppm): 55.40 (OCH<sub>3</sub>), 77.09 (CH), 111.54 (CH), 112.79 (CH), 117.32 (CH), 129.98 (C), 146.91 (C), 148.37 (C), 185.00 (C=S);  $\text{CHN}_{\text{Calculated}}$  (%): C (51.52), H (4.29), N (13.35), S (15.55), O (15.29);  $\text{CHN}_{\text{Found}}$  (%): C (51.34), H (4.83), N (12.88), S (14.98), O (15.97).

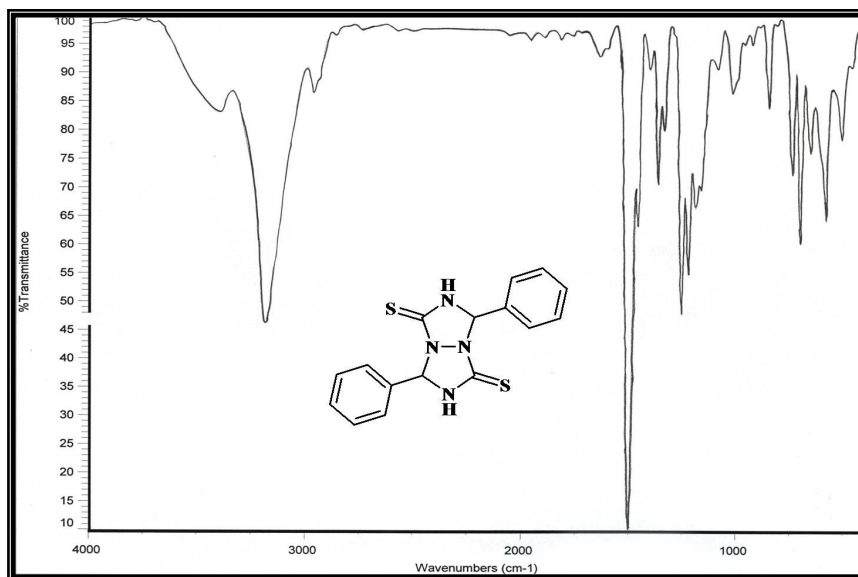

FT-IR of 3a

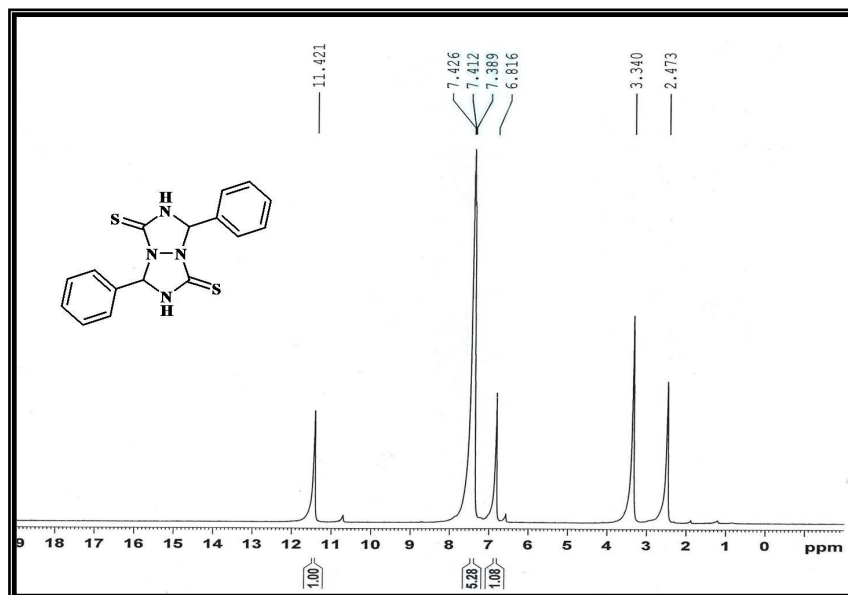

<sup>1</sup>H NMR of 3a

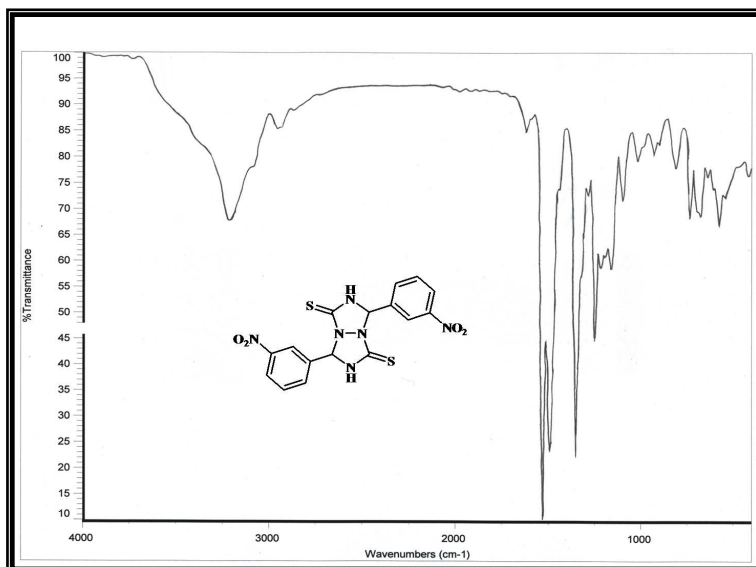

FT-IR of 3b

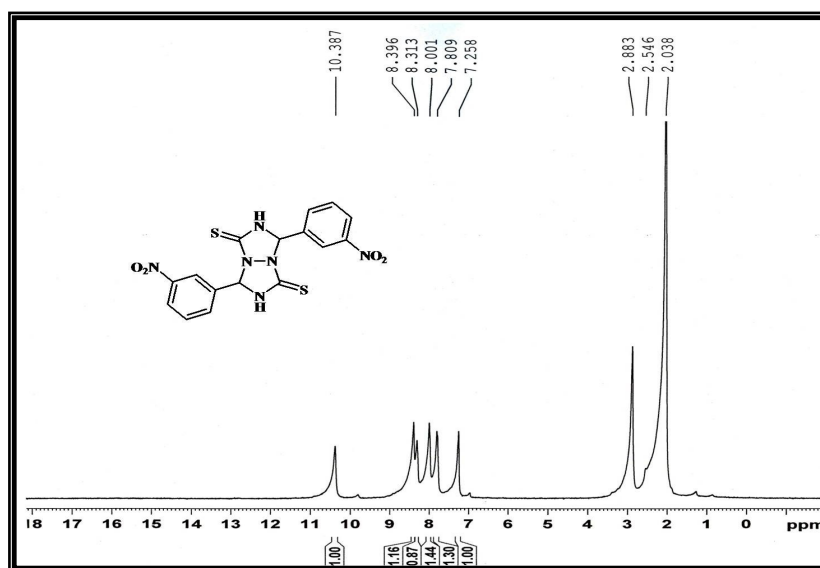

<sup>1</sup>H NMR of 3b

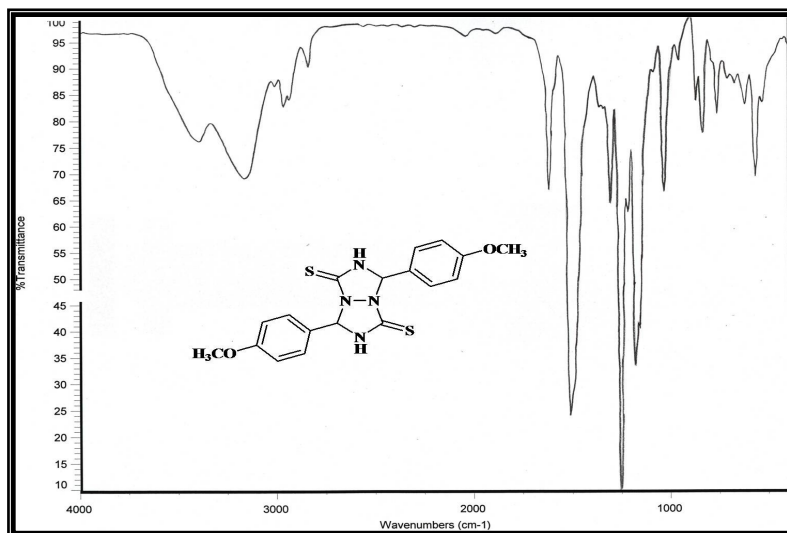

FT-IR of 3c

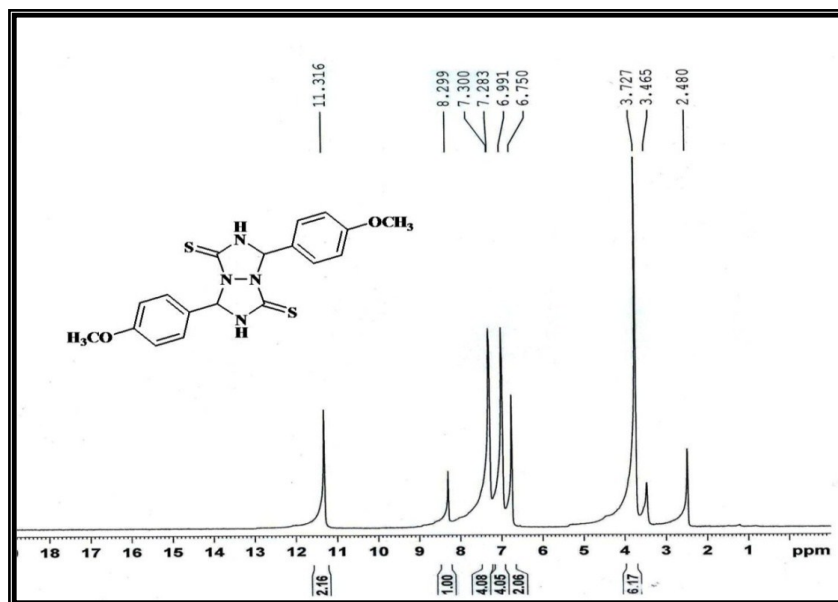

<sup>1</sup>H NMR of 3c

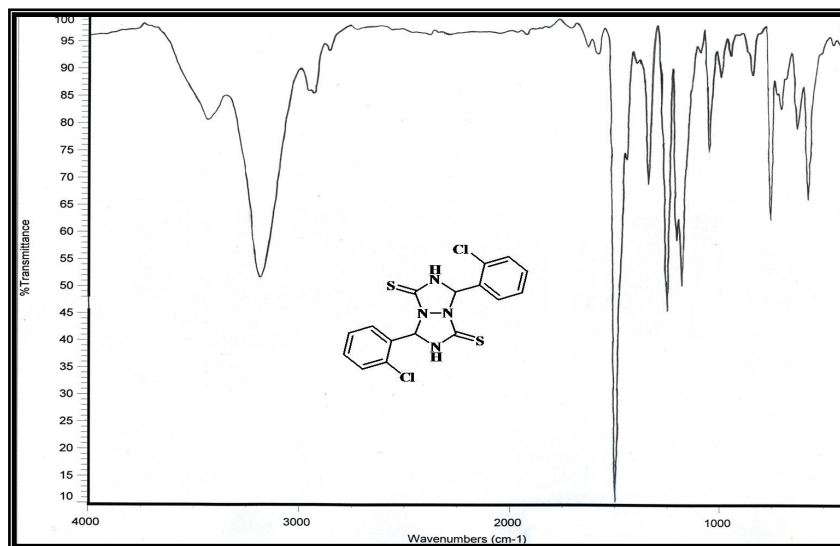

FT-IR of 3d

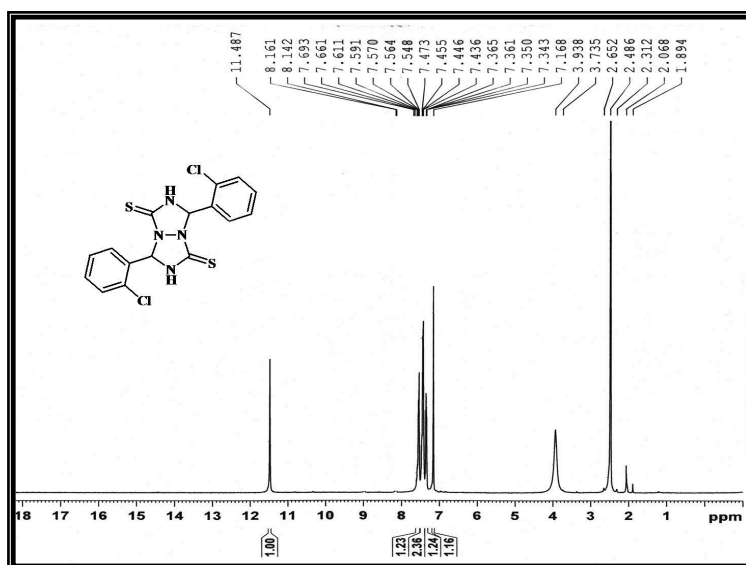

<sup>1</sup>H NMR of 3d

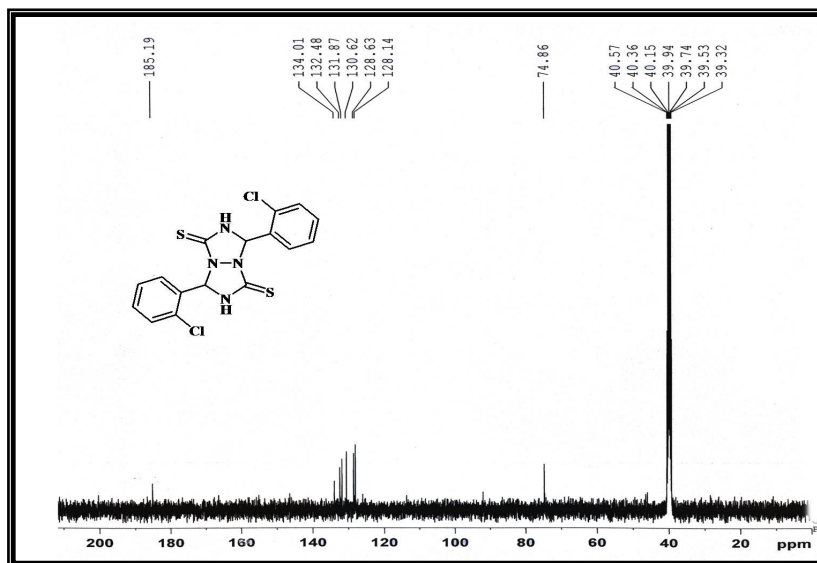

<sup>13</sup>C NMR of 3d

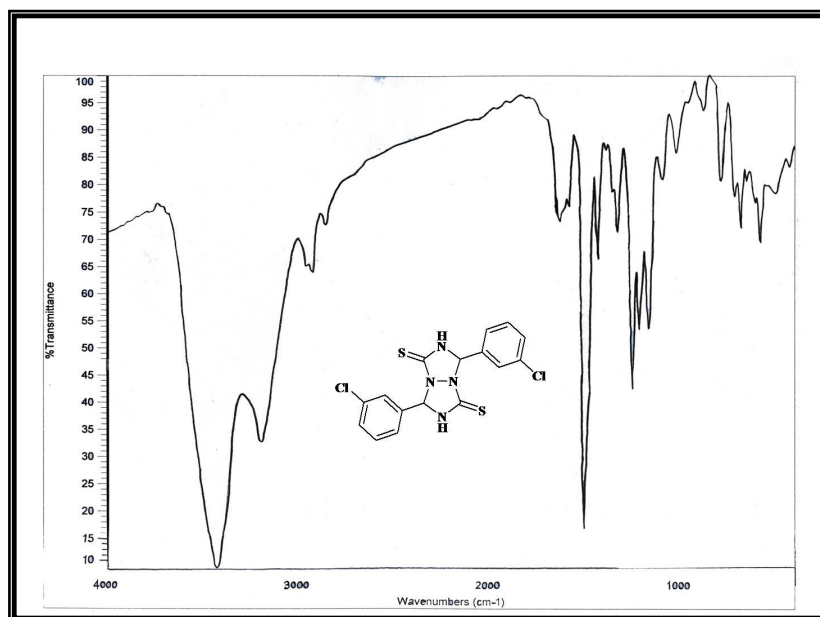

FT-IR of 3e

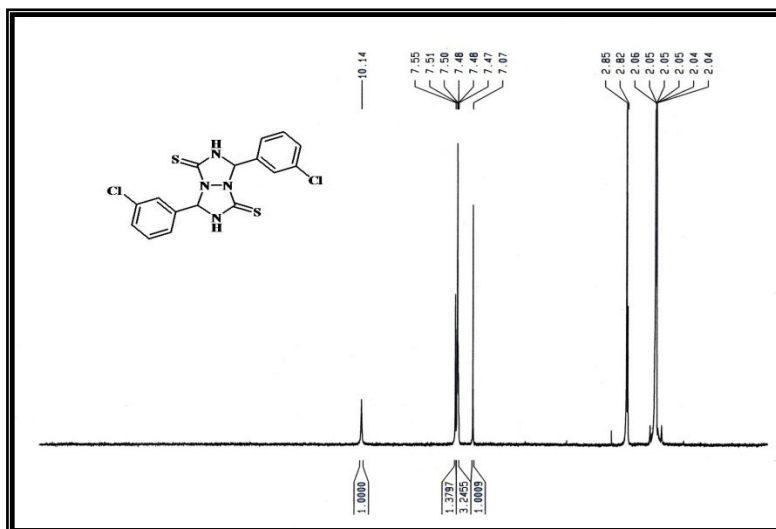

$^1\text{H}$  NMR of 3e

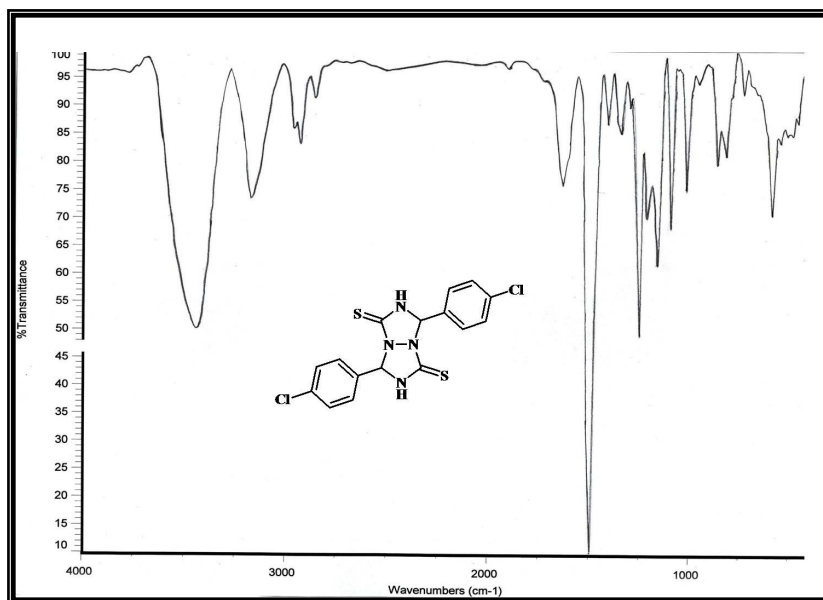

FT-IR of 3f

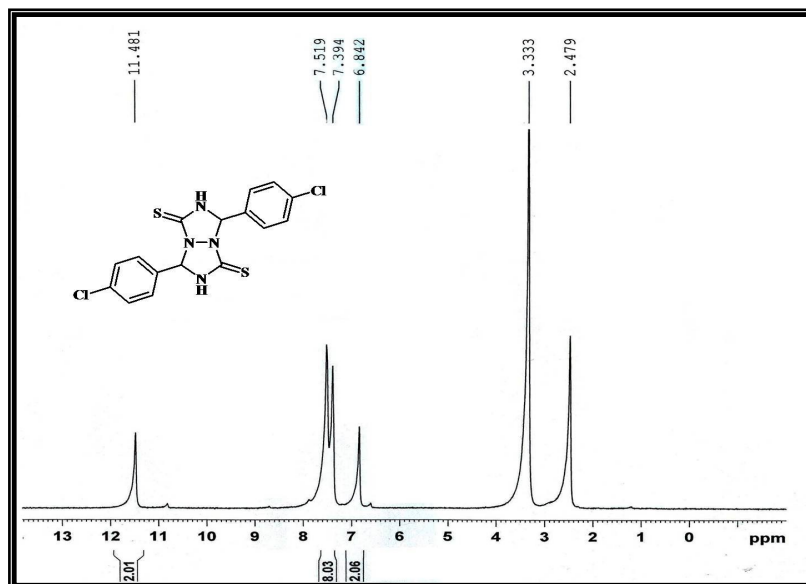

<sup>1</sup>H NMR of 3f

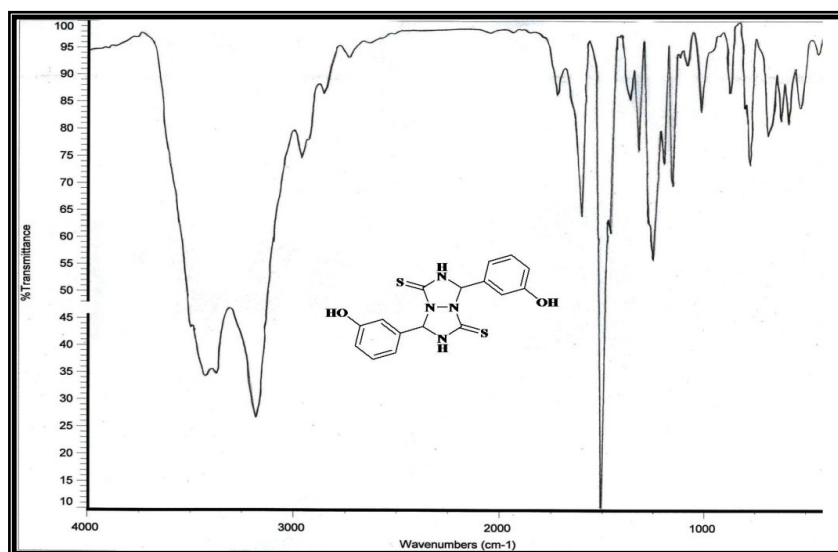

FT-IR of 3g



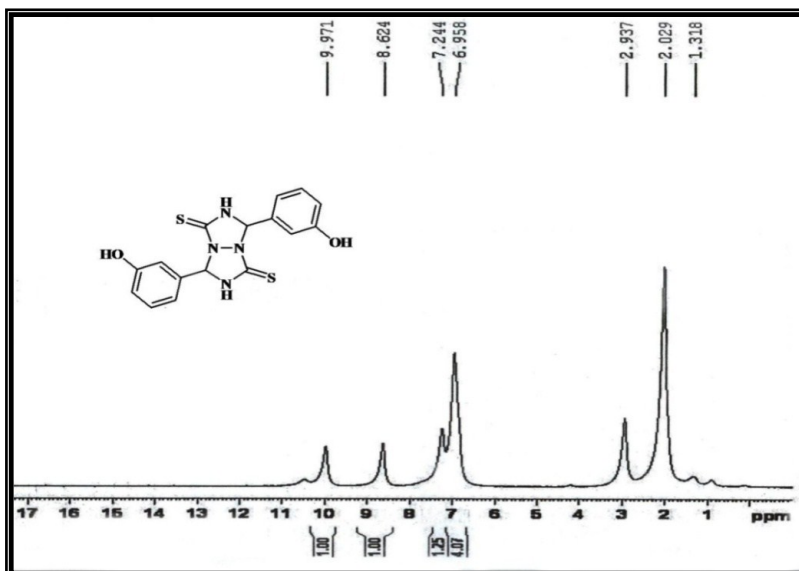

<sup>1</sup>H NMR of 3g

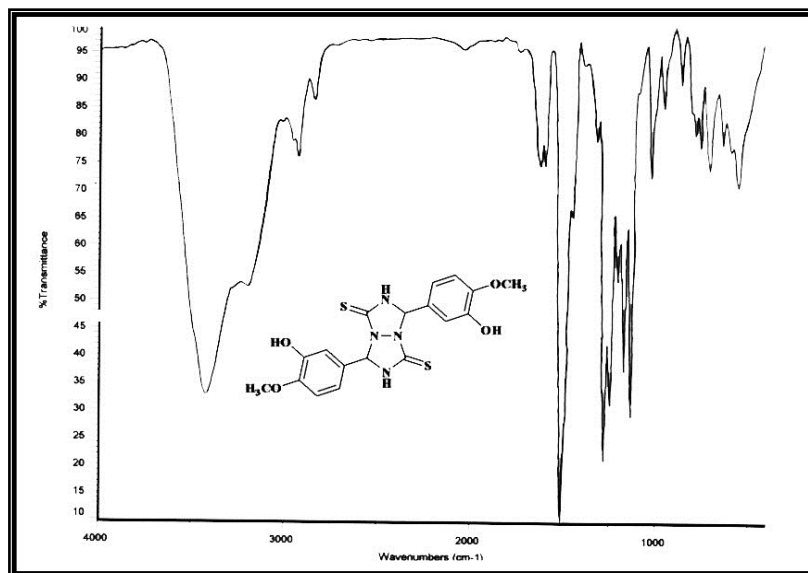

FT-IR of 3h

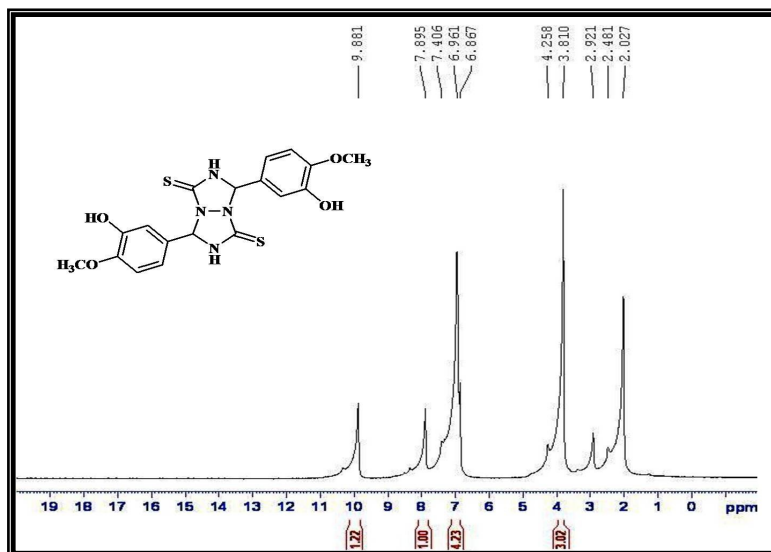

**<sup>1</sup>H NMR of 3h**

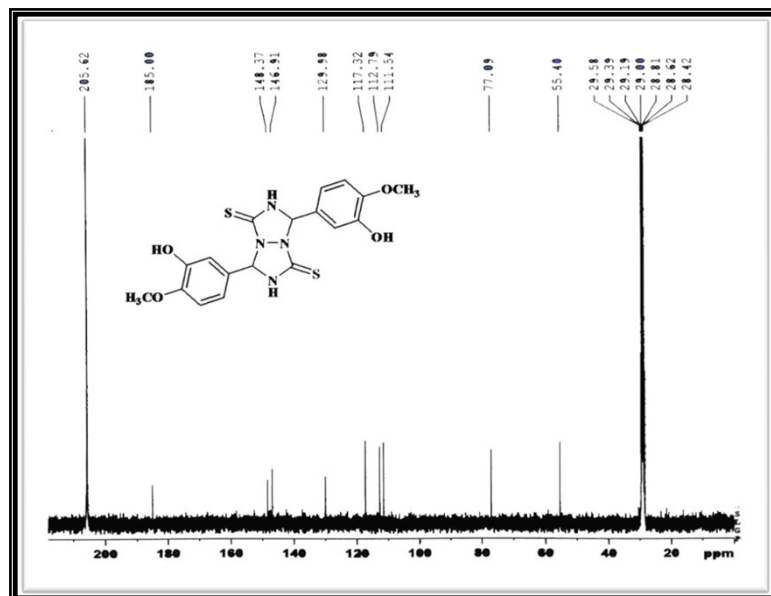

**<sup>13</sup>C NMR of 3h**
